# Supplementary material
Source: ML conference proceedings conference paper supplement (https://openaccess.thecvf.com/content/ICCV_2019/html/Chen_TensorMask_A_Foundation_ICCV_2019_paper.html)
Supplement: Supplementary file 1 [file Chen_TensorMask_A_Foundation_ICCV_2019_supplemental.pdf]

## A. Appendix

### A.1. Generalized Coordinate Transformation

In Sec. 3.4 we have assumed  $\sigma_{HW}=\hat{\sigma}_{HW}$  and  $\sigma_{VU}=\hat{\sigma}_{VU}$ . Here we relax this condition and only assume  $\sigma_{HW}=\hat{\sigma}_{HW}$ . Again, we still have the following two relations for  $x, u$ :  $x+\alpha u=\hat{x}$  and  $x=\hat{x}-\hat{\alpha}\hat{u}$ . Solving for  $\hat{x}$  and  $\hat{u}$  gives:  $\hat{x}=x+\alpha u$  and  $\hat{u}=\frac{\alpha}{\hat{\alpha}}u$ . Then `align2nat` is:

$$\mathcal{F}(v, u, y, x) = \hat{\mathcal{F}}(\frac{\alpha}{\hat{\alpha}}v, \frac{\alpha}{\hat{\alpha}}u, y+\alpha v, x+\alpha u). \quad (2)$$

More generally, consider arbitrary units  $\sigma_{HW}, \hat{\sigma}_{HW}, \sigma_{VU}$ , and  $\hat{\sigma}_{VU}$ . Then the relations between the natural and aligned representation can be rewritten as:

$$\begin{cases} x \cdot \sigma_{HW} + u \cdot \sigma_{VU} &= \hat{x} \cdot \hat{\sigma}_{HW} \\ x \cdot \hat{\sigma}_{HW} &= \hat{x} \cdot \hat{\sigma}_{HW} - \hat{u} \cdot \hat{\sigma}_{VU} \end{cases} \quad (3)$$

Note that these relations only hold in the image pixel domain (hence the usage of all units). Solving for  $\hat{x}, \hat{u}$  gives:

$$\begin{cases} \hat{x} &= \frac{\sigma_{HW}}{\hat{\sigma}_{HW}}x + \frac{\sigma_{VU}}{\hat{\sigma}_{HW}}u \\ \hat{u} &= \frac{\sigma_{VU}}{\hat{\sigma}_{VU}}u \end{cases} \quad (4)$$

And the `align2nat` transform becomes:

$$\mathcal{F}(v, u, y, x) = \hat{\mathcal{F}}(\frac{\sigma_{VU}}{\hat{\sigma}_{VU}}v, \frac{\sigma_{VU}}{\hat{\sigma}_{VU}}u, \frac{\sigma_{HW}}{\hat{\sigma}_{HW}}y + \frac{\sigma_{VU}}{\hat{\sigma}_{HW}}v, \frac{\sigma_{HW}}{\hat{\sigma}_{HW}}x + \frac{\sigma_{VU}}{\hat{\sigma}_{HW}}u). \quad (5)$$

This version of the coordinate transformation demonstrates the role of units and may enable more general uses.

### A.2. Aligned Representation and InstanceFCN

We prove that the InstanceFCN [7] output behaves as an upscaling aligned head with *nearest-neighbor* interpolation.

In [7], each output mask has  $V \times U$  pixels that are divided into  $K \times K$  bins. A mask pixel is read from the channel corresponding to the pixel's bin. In our notation, [7] predicts  $\mathcal{G}$  which is related to the natural representation  $\mathcal{F}$  by:

$$\mathcal{F}(v, u, y, x) = \mathcal{G}([\frac{K}{V}v], [\frac{K}{U}u], y+v, x+u), \quad (6)$$

where  $[\cdot]$  is a rounding operation and the integers  $[\frac{K}{V}v]$  and  $[\frac{K}{U}u]$  index a bin. Now, define a new function  $\tilde{\mathcal{F}}$  by:

$$\tilde{\mathcal{F}}(v, u, y+v, x+u) \triangleq \mathcal{G}([\frac{K}{V}v], [\frac{K}{U}u], y+v, x+u), \quad (7)$$

and new coordinates:  $\tilde{x}=x+u$  and  $\tilde{u}=u$  (likewise for  $v$  and  $y$ ). Then  $\tilde{\mathcal{F}}$  can be written as:

$$\tilde{\mathcal{F}}(\tilde{v}, \tilde{u}, \tilde{y}, \tilde{x}) \triangleq \mathcal{G}([\frac{K}{V}\tilde{v}], [\frac{K}{U}\tilde{u}], \tilde{y}, \tilde{x}). \quad (8)$$

Eqn.(8) says that  $\tilde{\mathcal{F}}$  is the *nearest-neighbor* interpolation of  $\mathcal{G}$  on  $(\tilde{V}, \tilde{U})$ . Eqn.(7), (6), and the new coordinates show that  $\mathcal{F}$  is computed from  $\tilde{\mathcal{F}}$  by the `align2nat` transform with  $\alpha=1$ . Thus, InstanceFCN masks can be constructed in the TensorMask framework by predicting  $\mathcal{G}$ , performing nearest-neighbor interpolation of  $\mathcal{G}$  on  $(\tilde{V}, \tilde{U})$  to get  $\tilde{\mathcal{F}}$ , and then using `align2nat` to compute natural masks  $\mathcal{F}$ .

### A.3. Object Detection Results

In Tab. 4 we show the associated *bounding-box* (bb) object detection results. Overall, TensorMask has a comparable box AP with Mask R-CNN and outperforms RetinaNet.

| method                      | aug | epochs | AP <sup>bb</sup> | AP <sup>bb</sup> <sub>50</sub> | AP <sup>bb</sup> <sub>75</sub> |
|-----------------------------|-----|--------|------------------|--------------------------------|--------------------------------|
| RetinaNet, <i>ours</i>      |     | 24     | 37.1             | 55.0                           | 39.9                           |
| RetinaNet, <i>ours</i>      | ✓   | 72     | 39.3             | 57.2                           | 42.4                           |
| Faster R-CNN, <i>ours</i>   | ✓   | 72     | 40.6             | 61.4                           | 44.2                           |
| Mask R-CNN, <i>ours</i>     | ✓   | 72     | 41.7             | 62.5                           | 45.7                           |
| TensorMask, <i>box-only</i> | ✓   | 72     | 40.8             | 60.4                           | 43.9                           |
| TensorMask                  | ✓   | 72     | 41.6             | 61.0                           | 45.1                           |

Table 4. **Object detection box AP on COCO test-dev.** All models use ResNet-50-FPN. ‘TensorMask, *box-only*’ is our model without the mask head: it resembles RetinaNet but with the mask-driven assignment rule and only 2 window sizes instead of 9 [23].

### A.4. Mask-Only TensorMask

One intriguing property of TensorMask is that *masks are not dependent on boxes*. This not only opens up new model designs that are mask-specific, but also allows us to investigate whether *box predictions improve masks in a multi-task setting*. Here, we conduct experiments *without* the use of a box head. Note that although we predict masks densely, we still need to perform NMS for post-processing. If regressed boxes are absent, we simply use the bounding boxes of the masks as a substitute (and also to report box AP).

Tab. 5 gives the results. We observe a slight degradation switching from the default setting which uses original boxes (row 1) for NMS to using mask bounding boxes (row 2). After accounting for this, TensorMask *without a box head* (row 3) has nearly equal mask AP to the mask+box variant (row 2). These results indicate that the role of the box head is auxiliary in our system, in contrast to Mask R-CNN.

| box head | NMS     | AP   | AP <sub>50</sub> | AP <sub>75</sub> | AP <sup>bb</sup> | AP <sup>bb</sup> <sub>50</sub> | AP <sup>bb</sup> <sub>75</sub> |
|----------|---------|------|------------------|------------------|------------------|--------------------------------|--------------------------------|
| ✓        | bb      | 35.2 | 56.4             | 37.0             | 41.6             | 60.8                           | 44.8                           |
| ✓        | mask-bb | 34.9 | 56.0             | 36.7             | 39.7             | 59.1                           | 41.8                           |
|          | mask-bb | 34.8 | 56.1             | 36.7             | 39.4             | 58.8                           | 41.6                           |

Table 5. **Multi-task benefits** of box training for mask prediction on COCO val2017 with our final ResNet-50-FPN model.

### A.5. Qualitative Comparisons and Calibration

We show more results in Figs. 10 and 11. For these, and all visualizations in the main text, we display all detections that have a *calibrated* score  $\geq 0.6$ . We use a simple calibration that maps uncalibrated detector scores to precision values: for each model and for each category, we compute its precision-recall (PR) curve on val2017. As a PR curve is parameterized by score, we can map an uncalibrated score for the detector-category pair to its corresponding precision value. Score-to-precision calibration enables a fair visual comparison between methods using a fixed threshold.







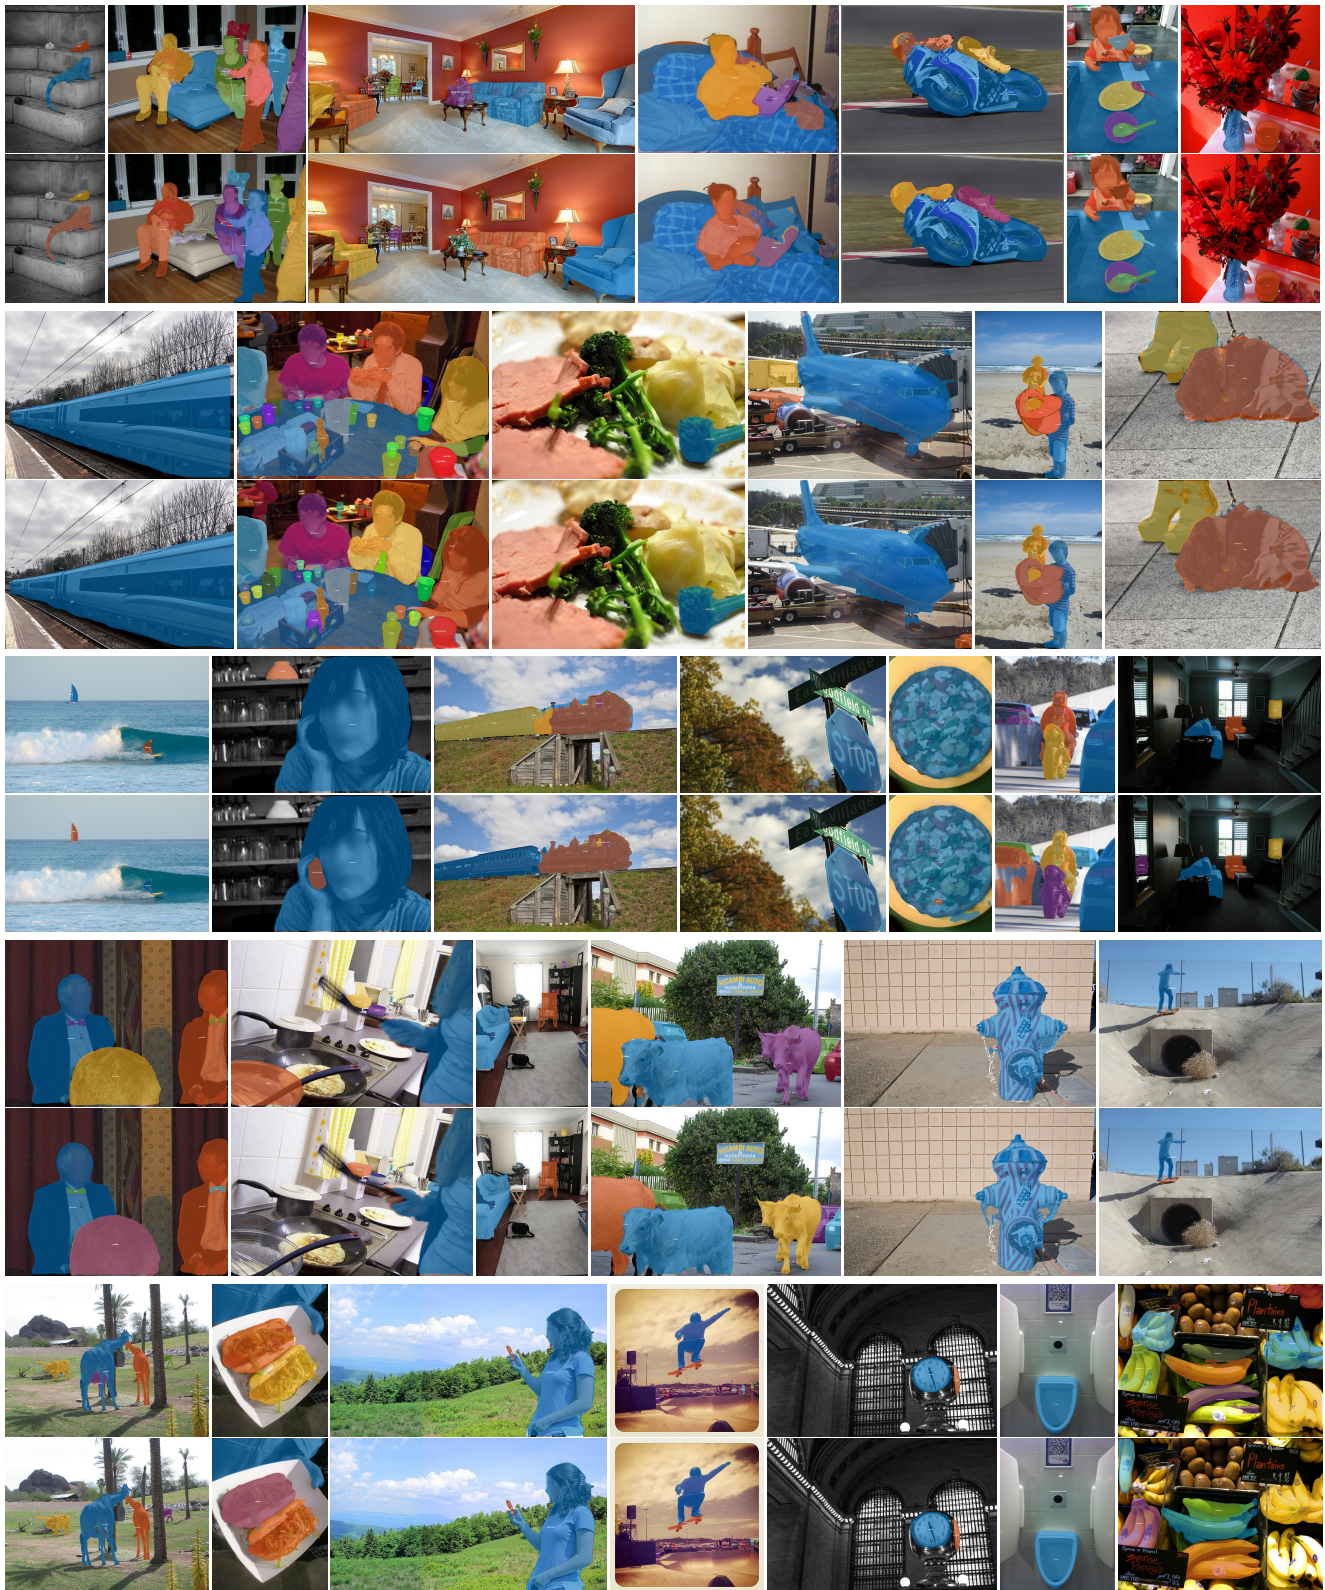

Figure 11. More results of Mask R-CNN [17] (top row per set) and TensorMask (bottom row per set) continued from Fig. 10.



## References

- [1] Pablo Arbeláez, Jordi Pont-Tuset, Jonathan T Barron, Ferran Marques, and Jitendra Malik. Multiscale combinatorial grouping. In *CVPR*, 2014. 2
- [2] Anurag Arnab and Philip HS Torr. Pixelwise instance segmentation with a dynamically instantiated network. In *CVPR*, 2017. 3
- [3] Min Bai and Raquel Urtasun. Deep watershed transform for instance segmentation. In *CVPR*, 2017. 3
- [4] Kai Chen, Jiangmiao Pang, Jiaqi Wang, Yu Xiong, Xiao-xiao Li, Shuyang Sun, Wansen Feng, Ziwei Liu, Jianping Shi, Wanli Ouyang, et al. Hybrid task cascade for instance segmentation. *arXiv:1901.07518*, 2019. 2
- [5] Liang-Chieh Chen, George Papandreou, Iasonas Kokkinos, Kevin Murphy, and Alan L Yuille. Semantic image segmentation with deep convolutional nets and fully connected crfs. In *ICLR*, 2015. 3
- [6] Marius Cordts, Mohamed Omran, Sebastian Ramos, Timo Rehfeld, Markus Enzweiler, Rodrigo Benenson, Uwe Franke, Stefan Roth, and Bernt Schiele. The cityscapes dataset for semantic urban scene understanding. In *CVPR*, 2016. 2, 3
- [7] Jifeng Dai, Kaiming He, Yi Li, Shaoqing Ren, and Jian Sun. Instance-sensitive fully convolutional networks. In *ECCV*, 2016. 2, 3, 4, 7, 8, 9
- [8] Jifeng Dai, Kaiming He, and Jian Sun. Instance-aware semantic segmentation via multi-task network cascades. In *CVPR*, 2016. 2
- [9] Piotr Dollár, Zhuowen Tu, Pietro Perona, and Serge Belongie. Integral channel features. In *BMVC*, 2009. 1
- [10] Pedro F Felzenszwalb, Ross B Girshick, David McAllester, and Deva Ramanan. Object detection with discriminatively trained part-based models. *PAMI*, 2010. 1, 4
- [11] Ross Girshick. Fast R-CNN. In *ICCV*, 2015. 3
- [12] Ross Girshick, Jeff Donahue, Trevor Darrell, and Jitendra Malik. Rich feature hierarchies for accurate object detection and semantic segmentation. In *CVPR*, 2014. 2
- [13] Ross Girshick, Ilija Radosavovic, Georgia Gkioxari, Piotr Dollár, and Kaiming He. Detectron. <https://github.com/facebookresearch/detectron>, 2018. 7, 8
- [14] Priya Goyal, Piotr Dollár, Ross Girshick, Pieter Noordhuis, Lukasz Wesolowski, Aapo Kyrola, Andrew Tulloch, Yangqing Jia, and Kaiming He. Accurate, large minibatch SGD: Training ImageNet in 1 hour. *arXiv:1706.02677*, 2017. 7
- [15] Bharath Hariharan, Pablo Arbeláez, Ross Girshick, and Jitendra Malik. Simultaneous detection and segmentation. In *ECCV*, 2014. 2
- [16] Kaiming He, Ross Girshick, and Piotr Dollár. Rethinking imagenet pre-training. *arXiv:1811.08883*, 2018. 7, 8
- [17] Kaiming He, Georgia Gkioxari, Piotr Dollár, and Ross Girshick. Mask R-CNN. In *ICCV*, 2017. 1, 2, 4, 7, 8, 10, 11
- [18] Kaiming He, Xiangyu Zhang, Shaoqing Ren, and Jian Sun. Deep residual learning for image recognition. In *CVPR*, 2016. 3, 7
- [19] Alexander Kirillov, Evgeny Levinkov, Bjoern Andres, Bogdan Savchynskyy, and Carsten Rother. Instancecut: from edges to instances with multicut. In *CVPR*, 2017. 3
- [20] Yann LeCun, Bernhard Boser, John S Denker, Donnie Henderson, Richard E Howard, Wayne Hubbard, and Lawrence D Jackel. Backpropagation applied to handwritten zip code recognition. *Neural computation*, 1989. 1, 2
- [21] Yi Li, Haozhi Qi, Jifeng Dai, Xiangyang Ji, and Yichen Wei. Fully convolutional instance-aware semantic segmentation. In *CVPR*, 2017. 2
- [22] Tsung-Yi Lin, Piotr Dollár, Ross Girshick, Kaiming He, Bharath Hariharan, and Serge Belongie. Feature pyramid networks for object detection. In *CVPR*, 2017. 4, 5, 6, 7
- [23] Tsung-Yi Lin, Priya Goyal, Ross Girshick, Kaiming He, and Piotr Dollár. Focal loss for dense object detection. In *ICCV*, 2017. 1, 2, 3, 5, 6, 7, 8, 9
- [24] Tsung-Yi Lin, Michael Maire, Serge Belongie, James Hays, Pietro Perona, Deva Ramanan, Piotr Dollár, and C Lawrence Zitnick. Microsoft COCO: Common objects in context. In *ECCV*, 2014. 1, 2, 3, 7
- [25] Shu Liu, Jiaya Jia, Sanja Fidler, and Raquel Urtasun. SGN: Sequential grouping networks for instance segmentation. In *ICCV*, 2017. 3
- [26] Shu Liu, Lu Qi, Haifang Qin, Jianping Shi, and Jiaya Jia. Path aggregation network for instance segmentation. In *CVPR*, 2018. 2
- [27] Wei Liu, Dragomir Anguelov, Dumitru Erhan, Christian Szegedy, Scott Reed, Cheng-Yang Fu, and Alexander C Berg. SSD: Single shot multibox detector. In *ECCV*, 2016. 1, 3, 5, 6, 7, 8
- [28] Jonathan Long, Evan Shelhamer, and Trevor Darrell. Fully convolutional networks for semantic segmentation. In *CVPR*, 2015. 3
- [29] Gerhard Neuhold, Tobias Ollmann, Samuel Rota Bulo, and Peter Kotschieder. The mapillary vistas dataset for semantic understanding of street scenes. In *ICCV*, 2017. 2, 3
- [30] Chao Peng, Tete Xiao, Zeming Li, Yuning Jiang, Xiangyu Zhang, Kai Jia, Gang Yu, and Jian Sun. MegDet: A large mini-batch object detector. In *CVPR*, 2018. 2
- [31] Pedro Pinheiro, Ronan Collobert, and Piotr Dollár. Learning to segment object candidates. In *NIPS*, 2015. 2, 3, 6, 7
- [32] Pedro Pinheiro, Tsung-Yi Lin, Ronan Collobert, and Piotr Dollár. Learning to refine object segments. In *ECCV*, 2016. 3
- [33] Joseph Redmon and Ali Farhadi. YOLO9000: better, faster, stronger. In *CVPR*, 2017. 3, 7, 8
- [34] Shaoqing Ren, Kaiming He, Ross Girshick, and Jian Sun. Faster R-CNN: Towards real-time object detection with region proposal networks. In *NIPS*, 2015. 1, 2, 3, 6, 8
- [35] Alexander Rush. Tensor considered harmful. 2019. 4
- [36] R. Vaillant, C. Monrocq, and Y. LeCun. Original approach for the localisation of objects in images. *IEE Proc. on Vision, Image, and Signal Processing*, 1994. 1
- [37] Koen EA van de Sande, Jasper RR Uijlings, Theo Gevers, and Arnold WM Smeulders. Segmentation as selective search for object recognition. In *ICCV*, 2011. 2
- [38] Paul Viola and Michael Jones. Rapid object detection using a boosted cascade of simple features. In *CVPR*, 2001. 1
- [39] Sergey Zagoruyko, Adam Lerer, Tsung-Yi Lin, Pedro Pinheiro, Sam Gross, Soumith Chintala, and Piotr Dollár. A multipath network for object detection. In *BMVC*, 2016. 2
